# Supplementary material for: UAS Hyperspatial LiDAR Data Performance in Delineation and Classification across a Gradient of Wetland Types
Source: MDPI journal article supplement (doi:10.3390/drones6100268), 2022-09-22

## Supplementary Materials

**Table S1.** shows the summary information about the site, the datasets, and the runtime of the models.

|                                     |                               | Site 1:<br>Maysville        | Site 2: Surf<br>City                       | Site 3:<br>Masonboro         | Site 4: River<br>Road              |
|-------------------------------------|-------------------------------|-----------------------------|--------------------------------------------|------------------------------|------------------------------------|
| Site<br>Information                 | Latitude (DMS)                | 77°14'17"W                  | 77°33'15"W                                 | 77°49'39"W                   | 77°55'11"W                         |
|                                     | Longitude (DMS)               | 34°54'1"N                   | 34°26'24"N                                 | 34°10'15"N                   | 34°5'12"N                          |
|                                     | Wetland Class                 | PFO<br>Water<br>Non-wetland | E2EM<br>PFO<br>PSS<br>Water<br>Non-wetland | E2EM<br>Water<br>Non-wetland | PFO<br>PEM<br>Water<br>Non-wetland |
|                                     | Area of Interest<br>in Acres  | 43.8                        | 78.3                                       | 110.0                        | 54.3                               |
| Fieldwork<br>Information            | Survey Dates                  | 1/22/2021                   | 11/6/2020                                  | 12/11/2020                   | 10/2/2020                          |
|                                     | # GCPs                        | 9                           | 12                                         | 17                           | 11                                 |
| Multispectral<br>Imagery            | Geotags in<br>Flight, overall | 2.435 m                     | 2.652 m                                    | 2.432 m                      | 8.944 m                            |
|                                     | Geotags PPK,<br>overall       | 0.085 m                     | 0.094 m                                    | 0.080 m                      | 0.567 m                            |
|                                     | GCPs XYZ RMSE                 | 14 cm                       | 15 cm                                      | 27 cm                        | 10 cm                              |
|                                     | GCPs used<br>numbers          | 5                           | 6                                          | 7                            | 6                                  |
|                                     | Spatial<br>Resolution (m)     | 12.69 cm                    | 12.61 cm                                   | 12.44 cm                     | 12.50 cm                           |
| Quanergy<br>LiDAR                   | # GCPs used                   | 6                           | 2                                          | -                            | 6                                  |
|                                     | # Check pints<br>used         | 4                           | 4                                          | 11                           | 4                                  |
|                                     | Unconstrained<br>RMSEz        | 0.445 m                     | 0.42 m                                     | 0.047 m                      | 1.971 m                            |
|                                     | Constrained<br>RMSEz          | 0.051 m                     | 0.078 m                                    | -                            | 0.049 m                            |
|                                     | DEM Point<br>Spacing in m     | 0.11                        | 0.08                                       | 0.07                         | 0.07                               |
|                                     | Raster Size in m              | 0.4                         | 0.3                                        | 0.28                         | 0.3                                |
| QL2 LiDAR                           | DEM Point<br>Spacing in m     | 0.63                        | 2.90                                       | 2.16                         | 0.63                               |
|                                     | Raster Size in m              | 2.5                         | 11.6                                       | 8.65                         | 2.5                                |
| # Of pixels<br>for Training<br>Data | UAS Stack                     | 162                         | 142                                        | 138                          | 86                                 |
|                                     | Airborne Stack                | 163                         | 157                                        | 142                          | 83                                 |

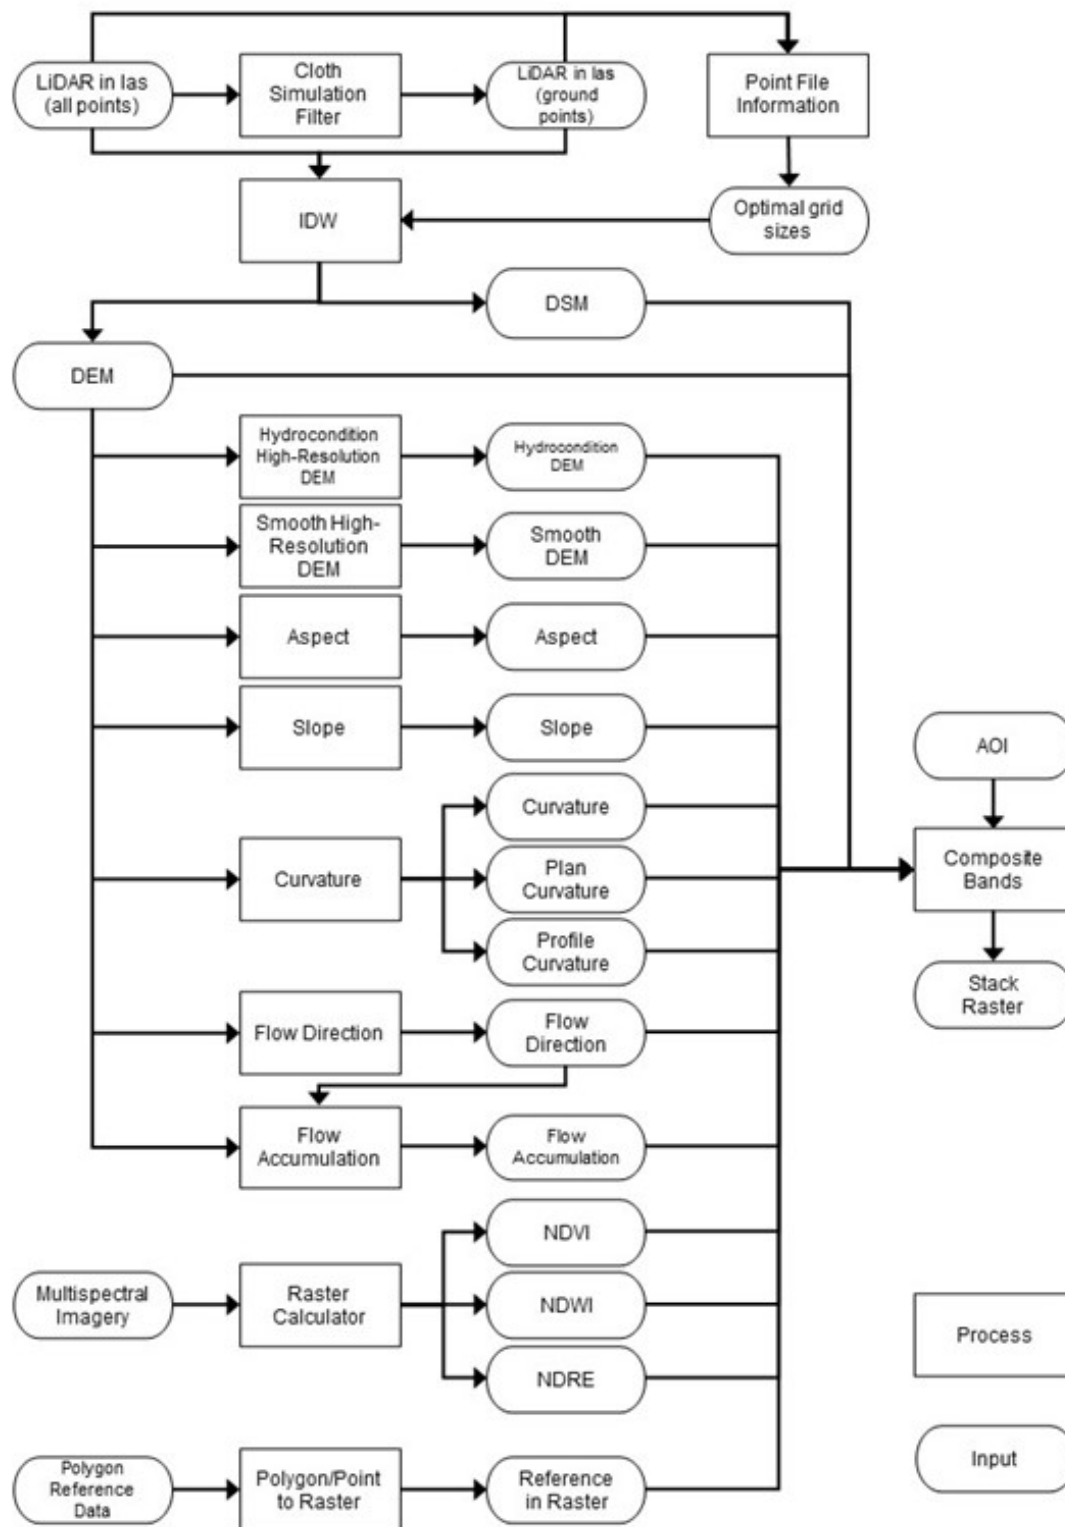

**Figure S1.** Workflow diagram showing the datasets, pre-processing, and processing steps used to derive random forest model inputs (raster stacks) for each site.

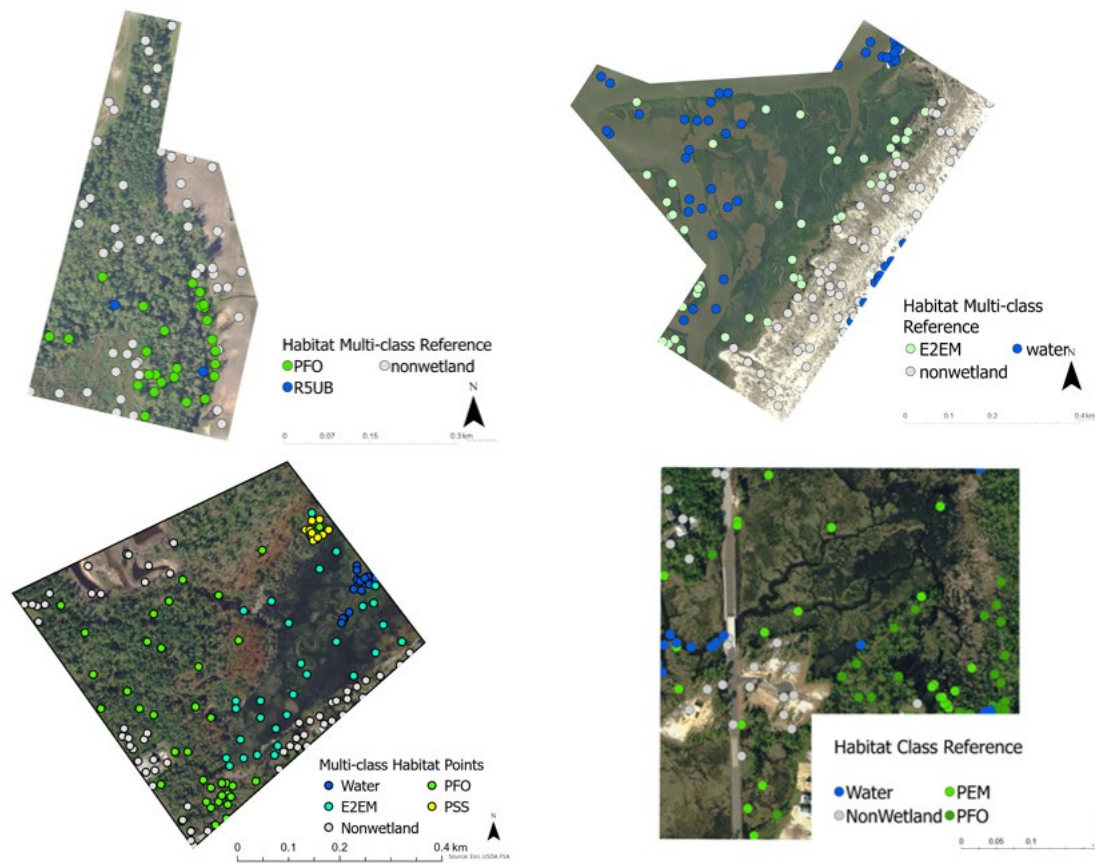

Figure S2. Habitat point distribution for each site overlaid on NAIP 2020 imagery

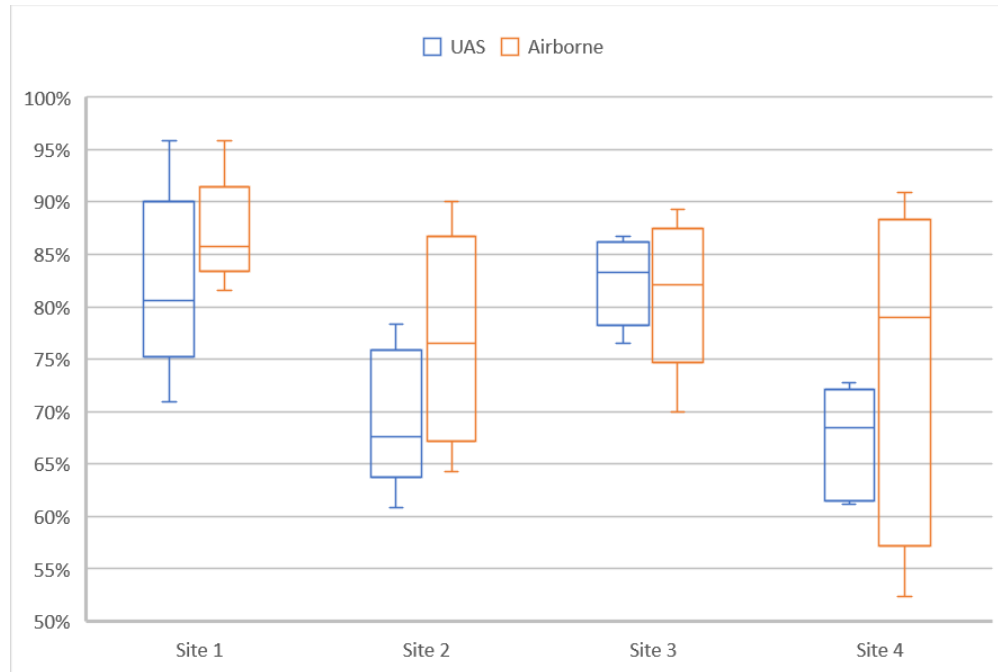

**Figure S3.** The standard deviation of the overall accuracy for each site (for each of the 5-fold cross validated models).

**Table S2.** Class sensitivity and specificity metrics for all models for all four study sites (QL2+MS indicates models parameterized with the airborne LiDAR and UAS multispectral data while Quanergy + MS denotes models parameterized with the UAS LiDAR and multispectral).

| Site                | Predictor     | Class              | Sensitivity | Specificity |
|---------------------|---------------|--------------------|-------------|-------------|
| Site 1<br>Maysville | QL2 + MS      | Non-wetland open   | 91.67%      | 92.98%      |
|                     |               | Non-wetland forest | 72.41%      | 97.74%      |
|                     |               | PFO                | 88.68%      | 94.50%      |
|                     |               | water              | 96.88%      | 98.46%      |
|                     | Quanergy + MS | Non-wetland-open   | 83.33%      | 91.30%      |
|                     |               | Non-wetland-forest | 75.86%      | 96.27%      |
|                     |               | PFO                | 86.79%      | 93.64%      |
|                     |               | water              | 93.94%      | 98.46%      |
| Site 2<br>Masonboro | QL2 + MS      | Non-wetland        | 84.00%      | 89.77%      |
|                     |               | Water              | 79.17%      | 92.22%      |
|                     |               | E2EM               | 85.00%      | 91.84%      |
|                     | Quanergy + MS | Non-wetland        | 90.38%      | 87.78%      |
|                     |               | Water              | 75.51%      | 95.70%      |
|                     |               | E2EM               | 87.80%      | 93.07%      |
| Site 3<br>Surf City | QL2 + MS      | E2EM               | 87.04%      | 93.18%      |
|                     |               | Non-wetland        | 75.68%      | 94.29%      |
|                     |               | PFO                | 91.67%      | 99.23%      |
|                     |               | water              | 90.00%      | 95.54%      |

|                                    |               |             |         |        |
|------------------------------------|---------------|-------------|---------|--------|
|                                    |               | PSS         | 66.67%  | 96.24% |
|                                    | Quanergy + MS | E2EM        | 81.97%  | 88.54% |
|                                    |               | Non-wetland | 65.79%  | 91.60% |
|                                    |               | PFO         | 100.00% | 99.30% |
|                                    |               | water       | 93.33%  | 89.76% |
|                                    |               | PSS         | 15.38%  | 98.61% |
| <b>Site 4</b><br><b>River Road</b> | QL2 + MS      | Non-wetland | 69.23%  | 88.33% |
|                                    |               | PEM         | 79.17%  | 80.65% |
|                                    |               | PFO         | 86.96%  | 96.83% |
|                                    |               | water       | 46.15%  | 97.26% |
|                                    | Quanergy + MS | Non-wetland | 60.87%  | 88.33% |
|                                    |               | PEM         | 87.50%  | 79.66% |
|                                    |               | PFO         | 86.96%  | 98.33% |
|                                    |               | water       | 53.85%  | 98.57% |

**Figure S4.** 3-dimensional visualizations of the four sites showing the UAS-collected LiDAR data for sites 1 through 4 as shown in Figure 2 (the elevation scales are the same for all 4 frames, although not included in each).

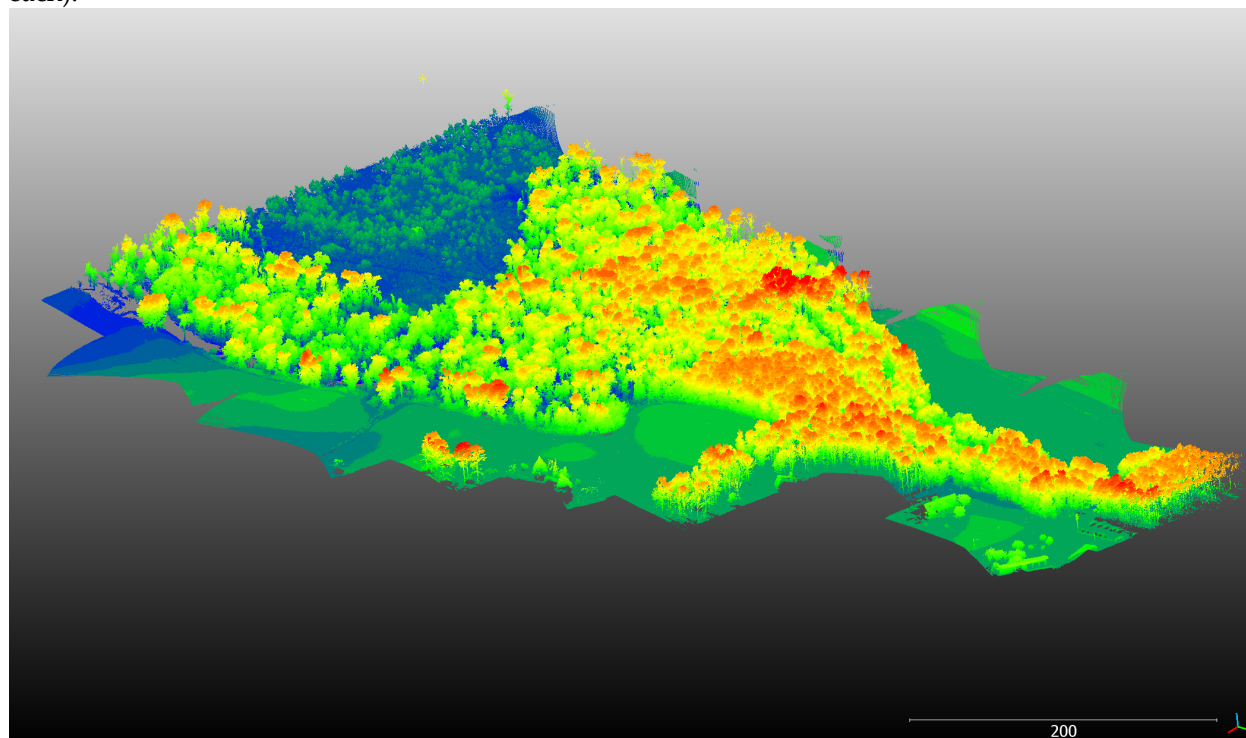

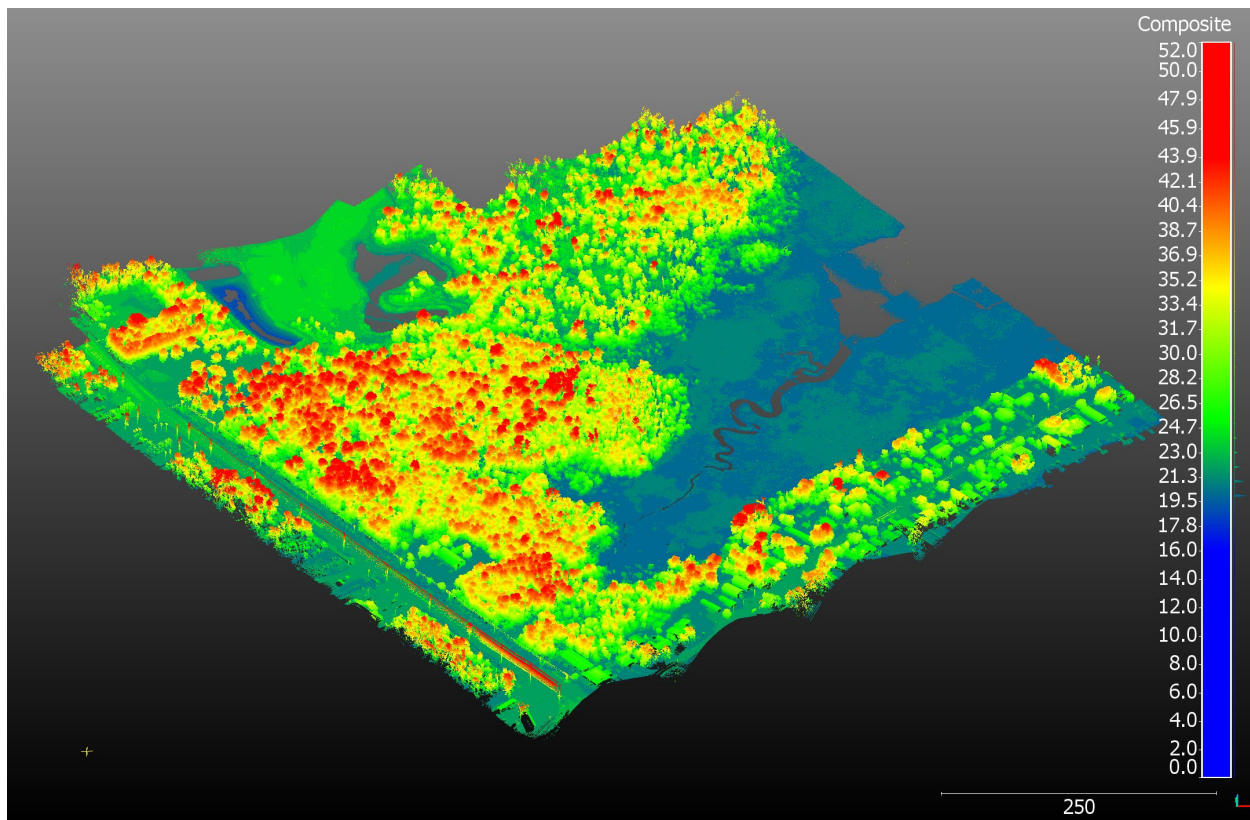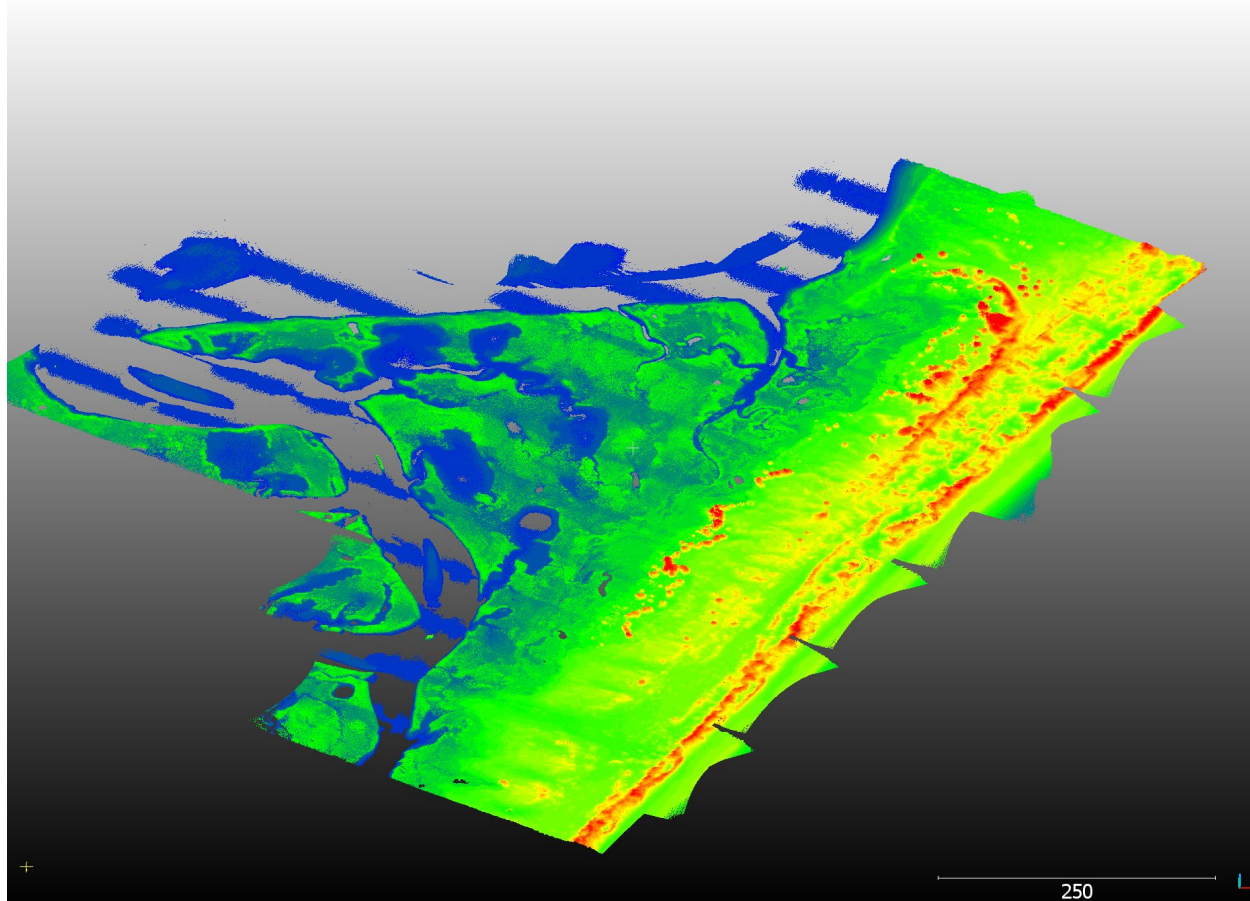



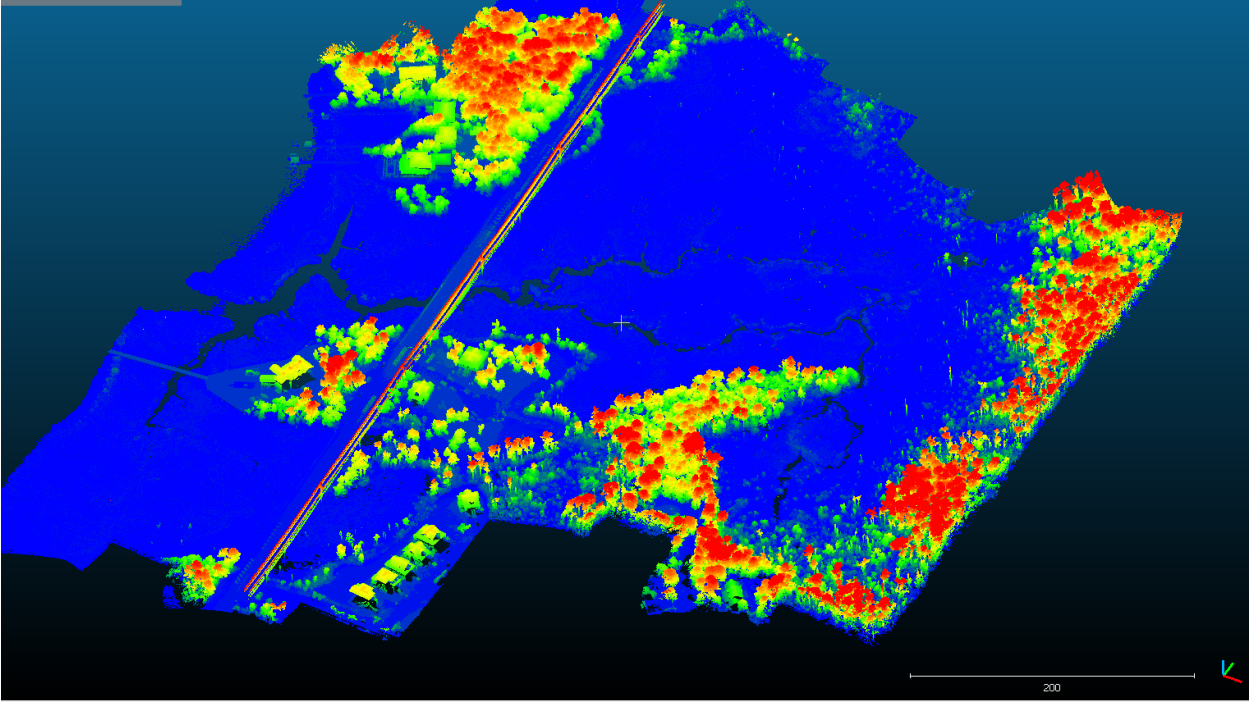

Supplement: s1 [file s1]
